# Supplementary material
Source: PubMed Central journal article supplement (PMC3575760)
Supplement: supp_blood-2012-05-425769_blood-2012-05-425769-1.pdf [file supp_blood-2012-05-425769_blood-2012-05-425769-1.pdf]

**Supplemental Table 1. Differentially expressed probe sets in PBMCs of patients with FHL.**

| <b>Affy_ID</b> | <b>Symbol</b> | <b>Description</b>                                                                | <b>P-value<sup>1</sup></b> | <b>P-value<sup>2</sup></b> | <b>P-value<sup>3</sup></b> | <b>Fold change<br/>1 vs. 2</b> | <b>Fold change<br/>1 vs. 3</b> | <b>Fold change<br/>2 vs.3</b> |
|----------------|---------------|-----------------------------------------------------------------------------------|----------------------------|----------------------------|----------------------------|--------------------------------|--------------------------------|-------------------------------|
| 229444_at      |               | Chromosome 6 open reading frame                                                   | 0.230041331                | 0.002789511                | 0.020392707                | 0.774307309                    | 0.378908906                    | 0.489352097                   |
| 236691_at      | LOC646509     | hypothetical protein LOC646509                                                    | 0.942496462                | 0.000774242                | 0.00206488                 | 1.00688562                     | 0.698631357                    | 0.693853744                   |
| 235147_at      | LOC440928     | hypothetical gene supported by AK096649                                           | 0.15111957                 | 0.004299448                | 0.050502918                | 0.659093803                    | 0.415799309                    | 0.630865148                   |
| 236282_at      |               | CDNA clone IMAGE:4826240                                                          | 0.290353933                | 0.006536929                | 0.023805975                | 0.882653368                    | 0.546740252                    | 0.619428047                   |
| 211780_x_at    | DCTN1         | dynactin 1 (p150, glued homolog, Drosophila)                                      | 0.014460882                | 0.007925613                | 0.156682879                | 0.721338258                    | 0.598480053                    | 0.829680177                   |
| 1552393_at     | ENTHD1        | ENTH domain containing 1                                                          | 0.113273621                | 0.002604583                | 0.027483832                | 0.91389876                     | 0.739016373                    | 0.8086414                     |
| 217623_at      | MYLK3,        | myosin light chain kinase 3                                                       | 0.137444543                | 0.00188591                 | 0.002681003                | 0.882077668                    | 0.719615571                    | 0.81581883                    |
| 209077_at      | TXN2          | thioredoxin 2                                                                     | 0.206524425                | 0.001085208                | 0.017978558                | 0.752016077                    | 0.491861281                    | 0.65405687                    |
| 210721_s_at    | PAK7          | p21(CDKN1A)-activated kinase 7                                                    | 0.98739611                 | 0.000499103                | 0.0027308                  | 1.000866064                    | 0.822803871                    | 0.822091886                   |
| 220317_at      | LRAT          | lecithin retinol acyltransferase (phosphatidylcholine--retinol O-acyltransferase) | 0.2319042                  | 0.004861812                | 0.014496534                | 0.932427904                    | 0.804131796                    | 0.862406404                   |
| 205991_s_at    | PRRX1         | paired related homeobox 1                                                         | 0.02185604                 | 0.002111709                | 0.015267184                | 0.899927822                    | 0.722718684                    | 0.803085165                   |
| 216443_at      | LUZP2         | Leucine zipper protein 2                                                          | 0.359630892                | 0.002880742                | 0.013548718                | 0.954608131                    | 0.815607948                    | 0.854390321                   |
| 231015_at      | KLF15         | Kruppel-like factor 15                                                            | 0.684791023                | 0.002599204                | 0.01589571                 | 0.980583021                    | 0.727224103                    | 0.741624205                   |
| 1554886_a_at   | MLXIP         | MLX interacting protein                                                           | 0.941865589                | 0.002778822                | 0.007966589                | 1.00545943                     | 0.76315063                     | 0.759006885                   |
| 244130_at      | HTR2A         | 5-hydroxytryptamine (serotonin) receptor 2A                                       | 0.227159513                | 0.005381187                | 0.021204353                | 0.958183647                    | 0.844359355                    | 0.881208271                   |
| 232256_s_at    | LOC401321     | hypothetical LOC401321                                                            | 0.80469222                 | 0.002211828                | 0.009227788                | 0.977684399                    | 0.481091306                    | 0.492072193                   |
| 241401_at      | C4orf12       | chromosome 4 open reading frame 12                                                | 0.440670239                | 0.007687579                | 0.011045439                | 0.969890436                    | 0.883282407                    | 0.910703285                   |
| 1552900_a_at   | MGC34034,     | hypothetical protein MGC34034                                                     | 0.410926211                | 0.000350847                | 0.001041785                | 0.969318645                    | 0.753303937                    | 0.777147887                   |
| 244852_at      | C18orf4       | chromosome 18 open reading frame 4                                                | 0.071897992                | 0.004850086                | 0.029598461                | 0.861582465                    | 0.733809683                    | 0.851699881                   |
| 1564785_at     | LOC196913     | hypothetical protein LOC196913                                                    | 0.028527281                | 0.007273758                | 0.037019066                | 0.863985358                    | 0.720998166                    | 0.83450276                    |
| 236173_s_at    | LRIG1         | Leucine-rich repeats and immunoglobulin-like domains 1                            | 0.023468143                | 0.001579218                | 0.04860273                 | 0.842070213                    | 0.710018772                    | 0.843182387                   |
| 228875_at      | C6orf189      | chromosome 6 open reading frame 189                                               | 0.776705667                | 0.001400043                | 0.001102813                | 0.973559614                    | 0.740486302                    | 0.760596775                   |
| 1561976_at     | C1orf167      | chromosome 1 open reading frame 167                                               | 0.0991479                  | 0.002525658                | 0.012328417                | 0.862977705                    | 0.718295001                    | 0.832344795                   |
| 1569937_at     |               | CDNA clone IMAGE:4799216                                                          | 0.699050625                | 0.003960436                | 0.001572685                | 1.025806335                    | 0.856523857                    | 0.834976182                   |
| 243243_at      | GPC3          | Glypican 3                                                                        | 0.432362701                | 0.002769755                | 0.003782825                | 1.072011851                    | 0.798580488                    | 0.74493625                    |
| 241693_at      | OSBPL1A       | Oxysterol binding protein-like 1A                                                 | 0.94059789                 | 0.001087377                | 0.003570388                | 0.992177599                    | 0.706773313                    | 0.712345566                   |
| 1561229_at     | LOC642376     | Hypothetical protein LOC642376                                                    | 0.719651148                | 0.000622117                | 0.002046376                | 1.015448122                    | 0.82267585                     | 0.810160393                   |
| 204159_at      | CDKN2C        | cyclin-dependent kinase inhibitor 2C (p18, inhibits CDK4)                         | 0.004965024                | 0.008604145                | 0.084377651                | 0.614221938                    | 0.381770625                    | 0.621551596                   |
| 201226_at      | NDUFB8        | NADH dehydrogenase (ubiquinone) 1 beta subcomplex, 8, 19kDa                       | 0.032143269                | 0.011254581                | 0.082437372                | 0.690932051                    | 0.580884191                    | 0.840725495                   |
| 224947_at      | RNF26         | ring finger protein 26                                                            | 0.014813351                | 0.024979848                | 0.20074447                 | 0.498151776                    | 0.402860666                    | 0.808710689                   |
| 202233_s_at    | UQCRH         | ubiquinol-cytochrome c reductase hinge protein                                    | 0.012189363                | 0.01773575                 | 0.160691488                | 0.727591105                    | 0.628471905                    | 0.863770736                   |
| 233049_x_at    | STUB1         | STIP1 homology and U-box containing protein 1                                     | 0.011631497                | 0.008012888                | 0.036239883                | 0.692432991                    | 0.564214108                    | 0.814828461                   |
| 227625_s_at    | STUB1         | STIP1 homology and U-box containing protein 1                                     | 0.024070405                | 0.012315582                | 0.130639313                | 0.673664082                    | 0.576624295                    | 0.855952263                   |
| 217934_x_at    | STUB1         | STIP1 homology and U-box containing protein 1                                     | 0.061224079                | 0.017458124                | 0.018995296                | 0.715686589                    | 0.608277667                    | 0.849921847                   |
| 1566783_at     | WBSCR17       | Williams-Beuren syndrome chromosome region 17                                     | 0.00256191                 | 0.01645438                 | 0.252367124                | 0.850937433                    | 0.799067491                    | 0.939043765                   |

|              |           |                                                                     |             |             |             |             |             |             |
|--------------|-----------|---------------------------------------------------------------------|-------------|-------------|-------------|-------------|-------------|-------------|
| 202298_at    | NDUFA1    | NADH dehydrogenase (ubiquinone) 1 alpha subcomplex, 1, 7.5kDa       | 0.029111501 | 0.006375053 | 0.415216514 | 0.502804102 | 0.453452286 | 0.90184683  |
| 229271_x_at  | COL11A1   | collagen, type XI, alpha 1                                          | 0.000658241 | 0.037879036 | 0.83528716  | 0.781465078 | 0.772369834 | 0.988361292 |
| 207356_at    | DEFB4     | defensin, beta 4                                                    | 0.00073384  | 0.030199089 | 0.923629694 | 0.77976125  | 0.776820345 | 0.996228455 |
| 219019_at    | LRDD      | leucine-rich repeats and death domain containing                    | 0.032273475 | 0.005777222 | 0.528062721 | 0.505409606 | 0.449532678 | 0.889442293 |
| 241699_at    | RY1       | Putative nucleic acid binding protein RY-1                          | 0.023510353 | 0.045519254 | 0.959572087 | 0.731315387 | 0.728433017 | 0.996058651 |
| 221791_s_at  | CCDC72    | coiled-coil domain containing 72                                    | 0.013867073 | 0.107948842 | 0.366156797 | 0.72094048  | 0.765562824 | 1.06189463  |
| 226791_at    | KIFC2     | kinesin family member C2                                            | 0.000409723 | 0.094904763 | 0.022284665 | 0.516297593 | 0.62116652  | 1.203117211 |
| 1555234_a_at | RHOJ      | ras homolog gene family, member J                                   | 0.001079117 | 0.185865003 | 0.192673409 | 0.739925387 | 0.809815108 | 1.094455093 |
| 202182_at    | GCN5L2    | GCN5 general control of amino-acid synthesis 5-like 2 (yeast)       | 0.000297058 | 0.191857774 | 0.111150634 | 0.545275597 | 0.66275086  | 1.215441997 |
| 1563512_at   | NOS1AP    | Nitric oxide synthase 1 (neuronal) adaptor protein                  | 0.000200248 | 0.134722526 | 0.002648691 | 0.719079479 | 0.819188857 | 1.139218795 |
| 237011_at    | LOC643837 | CDNA clone IMAGE:30529307                                           | 0.007071451 | 0.509197661 | 0.007540352 | 0.695584628 | 0.97053059  | 1.395273199 |
| 238389_s_at  | ---       | ---                                                                 | 0.008538243 | 0.883038085 | 0.006137125 | 0.173594417 | 0.708109836 | 4.079104905 |
| 223496_s_at  | CCDC8     | coiled-coil domain containing 8                                     | 0.013664163 | 0.948949957 | 0.00973677  | 0.60336963  | 0.865276122 | 1.434073044 |
| 225968_at    | PRICKLE2  | prickle-like 2 (Drosophila)                                         | 0.001593447 | 0.662080758 | 0.025185325 | 0.675877675 | 0.851084773 | 1.259229006 |
| 1562822_at   | NHS       | Nance-Horan syndrome (congenital cataracts and dental anomalies)    | 0.015252299 | 0.481422221 | 0.061394237 | 0.708015679 | 0.830146585 | 1.172497461 |
| 241540_at    | ---       | ---                                                                 | 0.002072589 | 0.78294481  | 0.016779524 | 0.655576662 | 0.865375902 | 1.320022435 |
| 1569251_a_at | ZNF333    | zinc finger protein 333                                             | 0.004285144 | 0.818599905 | 0.022220751 | 0.361329317 | 0.668968923 | 1.851410586 |
| 228207_at    | SPAG6     | Sperm associated antigen 6                                          | 0.002680076 | 0.255920645 | 0.125842838 | 0.495167293 | 0.618744753 | 1.24956709  |
| 232678_at    | SLC2A9    | solute carrier family 2 (facilitated glucose transporter), member 9 | 0.015147671 | 0.553042659 | 0.009035589 | 0.710792288 | 0.967474388 | 1.361121109 |
| 1554931_at   | CYP4A11   | cytochrome P450, family 4, subfamily A, polypeptide 11              | 0.006413512 | 0.804325277 | 0.011949511 | 0.735649439 | 0.946492432 | 1.286607972 |
| 234903_at    | OR2B3     | olfactory receptor, family 2, subfamily B, member 3                 | 0.015925674 | 0.828303096 | 0.005916    | 0.802034113 | 0.960691974 | 1.197819343 |
| 1564075_a_at | FLJ35848  | Hypothetical protein FLJ35848                                       | 0.006191702 | 0.217876843 | 0.002348481 | 0.7612516   | 1.037750538 | 1.363216233 |
| 236214_at    | NYD-SP18  | testes development-related NYD-SP18                                 | 0.006456311 | 0.656632834 | 0.009599196 | 0.728202846 | 0.917238657 | 1.259592245 |
| 217252_at    | OSIL      | oxidative stress induced like                                       | 0.008447659 | 0.972248511 | 0.0080064   | 0.737238585 | 0.933118291 | 1.265693778 |
| 233494_at    | ERBB4     | v-erb-a erythroblastic leukemia viral oncogene homolog 4 (avian)    | 0.005814889 | 0.189300363 | 0.032624107 | 0.695165875 | 0.842104081 | 1.211371432 |
| 214325_at    | GP2       | glycoprotein 2 (zymogen granule membrane)                           | 0.002631467 | 0.216519786 | 0.002448775 | 0.632900813 | 0.831126037 | 1.313201091 |
| 240009_at    | C21orf89  | Chromosome 21 open reading frame 89                                 | 0.006791578 | 0.780975383 | 0.006858273 | 0.703915272 | 0.960079969 | 1.363914107 |
| 1559392_s_at | SYT7      | synaptotagmin VII                                                   | 0.015335874 | 0.411835882 | 0.000926171 | 0.608347832 | 0.993899219 | 1.633767996 |
| 207051_at    | SLC17A4   | solute carrier family 17 (sodium phosphate), member 4               | 0.047220482 | 0.050146834 | 0.002147701 | 0.804856355 | 1.14037392  | 1.416866393 |
| 1566848_x_at | ---       | CDNA clone IMAGE:4815589                                            | 0.008091784 | 0.168074221 | 0.003397502 | 0.692850111 | 1.094166694 | 1.579225689 |
| 231073_at    | C1orf168  | chromosome 1 open reading frame 168                                 | 0.003096109 | 0.155508859 | 0.003957249 | 0.682335383 | 1.111794523 | 1.62939597  |
| 232638_at    | COL20A1   | collagen, type XX, alpha 1                                          | 0.005482253 | 0.104236224 | 0.000727909 | 0.74331199  | 1.077753366 | 1.449934053 |
| 211265_at    | PTGER3    | prostaglandin E receptor 3 (subtype EP3)                            | 0.022733831 | 0.008771585 | 0.000279192 | 0.789892068 | 1.197981616 | 1.516639634 |
| 241525_at    | LOC200772 | hypothetical protein LOC200772                                      | 0.023095432 | 0.336249612 | 0.006626452 | 0.39459836  | 1.009232753 | 2.557620245 |
| 1555843_at   | HNRPM     | Heterogeneous nuclear ribonucleoprotein M                           | 0.017300481 | 0.738156086 | 0.006431701 | 0.412398145 | 0.880427953 | 2.13489795  |

|              |               |                                                                                          |             |             |             |             |             |             |
|--------------|---------------|------------------------------------------------------------------------------------------|-------------|-------------|-------------|-------------|-------------|-------------|
| 211442_x_at  | CYP3A43       | cytochrome P450, family 3, subfamily A, polypeptide 43                                   | 0.030259964 | 0.137792216 | 0.00295968  | 0.795061783 | 1.06223924  | 1.336046157 |
| 237960_at    | Ccdc46        | Coiled-coil domain containing 46                                                         | 0.006565203 | 0.81941376  | 0.008738329 | 0.717178633 | 0.965910169 | 1.346819501 |
| 1561045_a_at |               | Homo sapiens, clone IMAGE:5548255, mRNA                                                  | 0.012130656 | 0.848351658 | 0.002167605 | 0.708335538 | 0.952251917 | 1.344351463 |
| 210614_at    | TTPA          | tocopherol (alpha) transfer protein (ataxia (Friedreich-like) with vitamin E deficiency) | 0.002635466 | 0.343674906 | 0.000596598 | 0.682189885 | 1.005615885 | 1.47409967  |
| 239293_at    | NRSN1         | neurensin 1                                                                              | 0.052378185 | 0.143089841 | 0.002173375 | 0.769122976 | 1.056972855 | 1.374257288 |
| 1561037_a_at |               | CDNA clone IMAGE:5260914                                                                 | 0.009588894 | 0.519848105 | 0.007284975 | 0.660753503 | 0.996728463 | 1.508472463 |
| 1565777_at   | ABCA1         | ATP-binding cassette, sub-family A (ABC1), member 1                                      | 0.007180608 | 0.336552669 | 0.004538528 | 0.298888815 | 1.087477626 | 3.638401876 |
| 1561671_at   | LOC286121     | hypothetical protein LOC286121                                                           | 0.005242998 | 0.063820486 | 0.002631968 | 0.793547178 | 1.1127208   | 1.402211274 |
| 242085_at    | C2orf18       | Chromosome 2 open reading frame 18                                                       | 0.018376901 | 0.089447653 | 0.002044351 | 0.820299341 | 1.056352275 | 1.287764383 |
| 238220_at    | UTX           | ubiquitously transcribed tetratricopeptide repeat, X chromosome                          | 0.034040258 | 0.159169947 | 0.005949158 | 0.524102329 | 1.155474497 | 2.204673465 |
| 201497_x_at  | MYH11         | myosin, heavy polypeptide 11, smooth muscle                                              | 0.019662616 | 0.30804422  | 0.005137164 | 0.801551569 | 1.004566944 | 1.253277995 |
| 1558128_at   | PAPOLA        | Poly(A) polymerase alpha                                                                 | 0.023635638 | 0.179159701 | 0.002903746 | 0.704056453 | 1.054620312 | 1.4979201   |
| 215666_at    | HLA-DRB4      | major histocompatibility complex, class II, DR beta 4                                    | 0.008143662 | 0.519651014 | 0.00468689  | 0.051829177 | 0.71105819  | 13.71926462 |
| 206746_at    | BFSP1         | beaded filament structural protein 1, filensin                                           | 0.005113111 | 0.666154737 | 0.00642571  | 0.690585089 | 0.942402239 | 1.36464319  |
| 218956_s_at  | PTCD1         | pentatricopeptide repeat domain 1                                                        | 0.004220459 | 0.343516617 | 0.003039516 | 0.595735406 | 1.021058419 | 1.713946173 |
| 222117_s_at  | ADCK2         | aarF domain containing kinase 2                                                          | 0.005482094 | 0.29726386  | 0.000769677 | 0.381710145 | 1.050060186 | 2.750936014 |
| 232348_at    | C18orf8       | Chromosome 18 open reading frame 8                                                       | 0.006940941 | 0.237021859 | 0.001683575 | 0.52170801  | 1.090888133 | 2.090993644 |
| 242374_at    | HIAT1         | Hippocampus abundant transcript 1                                                        | 0.135876629 | 0.025611009 | 0.001164442 | 0.623256706 | 1.589636327 | 2.550532247 |
| 1552315_at   | GIMAP1        | GTPase, IMAP family member 1                                                             | 0.009630412 | 0.660708977 | 0.01894342  | 2.603609271 | 2.181207769 | 1.736593252 |
| 232447_at    | DCAKD         | Dephospho-CoA kinase domain containing                                                   | 0.011235095 | 0.583860178 | 0.006360558 | 2.364581073 | 1.409919415 | 0.596266049 |
| 224856_at    | FKBP5         | FK506 binding protein 5                                                                  | 0.018095695 | 0.896331163 | 0.016607391 | 2.433388588 | 1.337776583 | 0.549758715 |
| 218692_at    | FLJ20366      | hypothetical protein FLJ20366                                                            | 0.001944709 | 0.3595542   | 0.052105352 | 1.136135987 | 1.072372258 | 0.943876675 |
| 237877_at    | GTPBP2        | GTP binding protein 2                                                                    | 0.007627969 | 0.890309806 | 0.005076655 | 1.820182274 | 1.210007423 | 0.664772666 |
| 1554059_at   | SETMAR        | SET domain and mariner transposase fusion gene                                           | 0.026817434 | 0.927834478 | 0.00036231  | 1.179265462 | 1.031921643 | 0.875054579 |
| 207037_at    | TNFRSF11A     | tumor necrosis factor receptor superfamily, member 11a, NFkB activator                   | 0.008574983 | 0.234673639 | 0.011558871 | 2.48105921  | 1.705041912 | 0.687223386 |
| 236018_at    | LCMT2         | Leucine carboxyl methyltransferase 2                                                     | 0.02114989  | 0.129892879 | 0.004103946 | 1.385686401 | 0.900562375 | 0.649903452 |
| 213925_at    | C1orf95       | Chromosome 1 open reading frame 95                                                       | 0.020357894 | 0.064259254 | 0.000912331 | 1.145840602 | 0.963774909 | 0.841107312 |
| 229110_at    | LOC100128844, | CDNA clone IMAGE:4794876                                                                 | 0.039828975 | 0.005657653 | 0.000631467 | 1.147509364 | 0.882418583 | 0.768985954 |
| 209331_s_at  | MAX           | MYC associated factor X                                                                  | 0.011436017 | 0.275862716 | 0.004195917 | 1.377125569 | 0.964346041 | 0.700260065 |
| 1554468_s_at | FBF1          | Fas (TNFRSF6) binding factor 1                                                           | 0.025150845 | 0.073692557 | 0.000924664 | 1.354899624 | 0.903094468 | 0.666539759 |
| 204893_s_at  | ZFYVE9        | zinc finger, FYVE domain containing 9                                                    | 0.450971097 | 0.004423244 | 0.00534159  | 0.799382373 | 1.957013351 | 2.448156749 |
| 1554707_at   | C9orf68       | chromosome 9 open reading frame 68                                                       | 0.087824722 | 0.007280409 | 0.003301936 | 0.906511034 | 1.192727047 | 1.315733623 |
| 1552423_at   | ETV3          | ets variant gene 3                                                                       | 0.044913011 | 0.008007547 | 0.001495638 | 0.581995546 | 2.047827498 | 3.51863088  |
| 207913_at    | CYP2F1        | cytochrome P450, family 2, subfamily F, polypeptide 1                                    | 0.291883776 | 0.001812766 | 0.00477919  | 0.944933323 | 1.21796319  | 1.288940882 |
| 227561_at    | LOC651619     | hypothetical protein LOC651619                                                           | 0.280102988 | 0.008972202 | 0.003318287 | 0.925749069 | 1.256599594 | 1.357386831 |

|              |          |                                                                                      |             |             |             |             |             |             |
|--------------|----------|--------------------------------------------------------------------------------------|-------------|-------------|-------------|-------------|-------------|-------------|
| 203130_s_at  | KIF5C    | kinesin family member 5C                                                             | 0.078414257 | 0.036923202 | 0.000175218 | 0.432674898 | 1.783712015 | 4.122522533 |
| 1557170_at   | NEK8     | NIMA (never in mitosis gene a)- related kinase 8                                     | 0.119397612 | 0.013845617 | 0.000257371 | 0.838254822 | 1.195279439 | 1.425914183 |
| 1565650_at   | Arf1,    | ADP-ribosylation factor 1                                                            | 0.158255874 | 0.005330038 | 0.000355577 | 0.807242842 | 1.488740305 | 1.844228561 |
| 205836_s_at  | YTHDC2   | YTH domain containing 2                                                              | 0.161327642 | 0.001793111 | 0.002335808 | 0.883007531 | 1.568052032 | 1.775808221 |
| 204094_s_at  | TSC22D2  | TSC22 domain family, member 2                                                        | 0.382550744 | 0.005818723 | 0.01462932  | 1.060761132 | 1.418083288 | 1.336854496 |
| 209011_at    | TRIO     | triple functional domain (PTPRF interacting)                                         | 0.715884012 | 0.003716917 | 0.008369718 | 1.072509471 | 1.761218902 | 1.642147645 |
| 236621_at    | RPS27    | ribosomal protein S27 (metallopanstimulin 1)                                         | 0.401427939 | 0.001732732 | 0.013500687 | 1.285303062 | 4.105769964 | 3.194398336 |
| 215671_at    | PDE4B    | phosphodiesterase 4B, cAMP-specific (phosphodiesterase E4 dunce homolog, Drosophila) | 0.904220234 | 0.0017456   | 0.007223037 | 1.031316039 | 2.732987201 | 2.649999706 |
| 1558691_a_at | DOCK4    | dedicator of cytokinesis 4                                                           | 0.578998586 | 0.005562998 | 0.010843684 | 1.477072581 | 6.416805747 | 4.344272467 |
| 1570106_at   | C1orf71  | Chromosome 1 open reading frame 71                                                   | 0.411597712 | 0.006848478 | 0.00367196  | 1.137305307 | 1.600100966 | 1.406922975 |
| 1563364_at   | RFXDC2   | Regulatory factor X domain containing 2                                              | 0.129081058 | 0.003708743 | 0.02249464  | 1.544292    | 3.610647743 | 2.338060252 |
| 209378_s_at  | KIAA1128 | KIAA1128                                                                             | 0.020502276 | 0.002192241 | 0.027478278 | 1.573400208 | 3.156574383 | 2.006212003 |
| 221561_at    | SOAT1    | sterol O-acyltransferase (acyl-Coenzyme A: cholesterol acyltransferase) 1            | 0.448772517 | 0.007299223 | 0.006712646 | 1.330459935 | 3.082488001 | 2.316858944 |
| 212665_at    | TIPARP   | TCDD-inducible poly(ADP-ribose) polymerase                                           | 0.574043604 | 0.002368174 | 0.003466833 | 0.887950776 | 1.9248289   | 2.167720275 |
| 1555855_at   | AKR1C2   | Aldo-keto reductase family 1, member C2 (dihydrodiol dehydrogenase 2)                | 0.938401419 | 0.002181243 | 0.000163414 | 1.01202727  | 1.562189404 | 1.543623824 |
| 1552931_a_at | PDE8A    | phosphodiesterase 8A                                                                 | 0.322085775 | 0.001200233 | 0.003094381 | 1.159519843 | 2.267447997 | 1.955505989 |
| 241616_at    | CD55     | CD55 molecule, decay accelerating factor for complement (Cromer blood group)         | 0.143117664 | 0.00519357  | 0.018809017 | 1.485714508 | 3.942204209 | 2.653406282 |
| 232574_at    | XYLT1    | xylosyltransferase I                                                                 | 0.503956909 | 0.00377905  | 0.009580863 | 1.061746346 | 1.54278746  | 1.453065947 |
| 241659_at    | JMJD1C   | Jumonji domain containing 1C                                                         | 0.965724891 | 0.001479871 | 0.004794575 | 1.004576838 | 1.851317481 | 1.842882905 |
| 1557943_at   | CNP      | 2',3'-cyclic nucleotide 3' phosphodiesterase                                         | 0.663532057 | 0.001637303 | 0.00290208  | 1.070452752 | 1.649779101 | 1.541197495 |
| 242836_at    | ATP1B3   | ATPase, Na+/K+ transporting, beta 3 polypeptide                                      | 0.827751906 | 0.00071558  | 0.012038399 | 1.102244825 | 5.409502673 | 4.907714283 |
| 244805_at    |          | cordon-bleu homolog (mouse)                                                          | 0.495029936 | 5.66305E-05 | 0.011272993 | 1.044859404 | 1.197500676 | 1.146087858 |
| 209978_s_at  | LPA      | lipoprotein, Lp(a) /// plasminogen                                                   | 0.943791226 | 0.000422616 | 0.006255755 | 0.993859267 | 1.270909428 | 1.278761964 |
| 1552788_a_at | HELB     | helicase (DNA) B                                                                     | 0.122361355 | 0.009234453 | 0.005268538 | 2.292234058 | 3.86641482  | 1.686745211 |
| 1562409_s_at |          | CDNA clone IMAGE:5269062                                                             | 0.182580025 | 0.002474525 | 0.014347708 | 1.089788431 | 1.222522097 | 1.121797646 |
| 217419_x_at  | AGRIN    | agrin                                                                                | 0.409055467 | 0.003448221 | 0.001420602 | 1.245188478 | 2.117459578 | 1.700513308 |
| 239766_at    | HSPBAP1  | HSPB (heat shock 27kDa) associated protein 1                                         | 0.026590792 | 0.001074674 | 0.473002345 | 2.203141244 | 2.649098433 | 1.202418792 |
| 1569921_at   | ADK      | Adenosine kinase                                                                     | 0.023515103 | 0.001997397 | 0.499298166 | 1.520254699 | 1.633972867 | 1.07480205  |
| 217643_x_at  | FLJ22795 | Hypothetical protein FLJ22795                                                        | 0.116806407 | 0.006284445 | 0.018015572 | 1.225261216 | 1.455247496 | 1.187703876 |
| 202686_s_at  | AXL      | AXL receptor tyrosine kinase                                                         | 0.027676046 | 0.004537833 | 0.269987577 | 4.546163922 | 6.123553864 | 1.346971638 |
| 1562611_at   | AKAP13   | kinase (PRKA) anchor protein 13                                                      | 0.035631552 | 0.00308334  | 0.155052971 | 2.463072227 | 4.10003525  | 1.66460212  |
| 210214_s_at  | BMPR2    | bone morphogenetic protein receptor, type II (serine/threonine kinase)               | 0.005972687 | 0.068467243 | 0.123888939 | 2.226480908 | 1.766742187 | 0.793513289 |
| 242189_at    | HOMER1   | Homer homolog 1 (Drosophila)                                                         | 0.083063844 | 0.005844444 | 0.203990197 | 2.271850657 | 3.128670077 | 1.377146014 |
| 209456_s_at  | FBXW11   | F-box and WD-40 domain protein 11                                                    | 0.048940946 | 0.019914544 | 0.3353188   | 1.564778756 | 1.716971999 | 1.097261828 |
| 240552_at    | MTHFD1L  | Methylenetetrahydrofolate dehydrogenase (NADP+ dependent) 1-like                     | 0.018243446 | 0.017362392 | 0.307182133 | 5.202060116 | 8.417214129 | 1.61805399  |
| 209012_at    | TRIO     | triple functional domain (PTPRF interacting)                                         | 0.016183031 | 0.006304372 | 0.10140656  | 1.564386216 | 1.846687555 | 1.180455016 |

|             |              |                                                                          |             |             |             |             |             |             |
|-------------|--------------|--------------------------------------------------------------------------|-------------|-------------|-------------|-------------|-------------|-------------|
| 222467_s_at | SAPS3        | SAPS domain family, member 3                                             | 0.00187195  | 0.002620186 | 0.008784026 | 1.210822033 | 1.321564356 | 1.091460446 |
| 231207_at   | Mrps30,      | mitochondrial ribosomal protein S30                                      | 0.016982274 | 0.00500731  | 0.84838583  | 3.376929642 | 3.592726505 | 1.063903275 |
| 1566284_at  | REV3L,       | REV3-like, catalytic subunit of DNA polymerase zeta (yeast)              | 0.005161692 | 0.021140807 | 0.749807952 | 2.475338997 | 2.33910088  | 0.944961835 |
| 244567_at   |              | Transcribed locus                                                        | 0.010852954 | 0.007777749 | 0.223658584 | 4.305749948 | 5.390306619 | 1.251885661 |
| 204684_at   | NPTX1        | neuronal pentraxin I                                                     | 0.00094217  | 0.015651274 | 0.561661559 | 2.532442962 | 2.899526762 | 1.144952445 |
| 210171_s_at | CREM         | cAMP responsive element modulator                                        | 0.004652196 | 0.059236863 | 0.66416842  | 2.382954172 | 2.229091351 | 0.935431901 |
| 227289_at   | LOC144997    | hypothetical protein LOC144997                                           | 0.001752841 | 0.010016793 | 0.204900034 | 1.295802132 | 1.404433165 | 1.08383304  |
| 1570593_at  | ATP8A1,      | ATPase, aminophospholipid transporter (APLT), class I, type 8A, member 1 | 0.022205014 | 0.027812162 | 0.928343335 | 2.090432656 | 2.063268947 | 0.9870057   |
| 235756_at   | SAMD4A       | Sterile alpha motif domain containing 4A                                 | 0.002759073 | 0.041138901 | 0.449822118 | 2.537816528 | 2.279963911 | 0.898395879 |
| 244794_at   |              | Transcribed locus                                                        | 0.013976996 | 0.228196361 | 0.184260447 | 3.216756095 | 2.21896014  | 0.68981299  |
| 233377_at   | ARID5B       | AT rich interactive domain 5B (MRF1-like)                                | 0.005482514 | 0.150793658 | 0.477708781 | 4.724014361 | 3.680434304 | 0.779090414 |
| 227027_at   | GFPT1,       | glutamine-fructose-6-phosphate transaminase 1                            | 0.010556456 | 0.262295027 | 0.118592075 | 2.801195159 | 2.062709413 | 0.73636762  |
| 226819_at   |              | LSM11, U7 small nuclear RNA associated                                   | 0.026876078 | 0.097308588 | 0.315765977 | 3.300825053 | 2.760539808 | 0.836318122 |
| 237725_x_at | SMC5         | structural maintenance of chromosomes 5                                  | 0.004487652 | 0.099412771 | 0.145944348 | 2.029399047 | 1.736219124 | 0.855533625 |
| 238421_at   | MNAB         | Membrane associated DNA binding protein                                  | 0.041848609 | 0.038371692 | 0.307030138 | 3.132392293 | 3.655081263 | 1.166865744 |
| 1566285_at  | REV3L,       | REV3-like, catalytic subunit of DNA polymerase zeta (yeast)              | 0.013723924 | 0.04626565  | 0.779768468 | 1.995894608 | 2.053178074 | 1.028700647 |
| 242059_at   | ETNK1        | Ethanolamine kinase 1                                                    | 0.01424069  | 0.016905627 | 0.407402107 | 1.940661792 | 2.073617013 | 1.068510248 |
| 239596_at   | SLC30A7      | solute carrier family 30 (zinc transporter), member 7                    | 0.02047263  | 0.081323989 | 0.839815888 | 2.33976448  | 2.4241411   | 1.036062014 |
| 231282_at   | C10orf70     | Chromosome 10 open reading frame 70                                      | 0.016847493 | 0.14161039  | 0.459193116 | 1.602141789 | 1.509256269 | 0.942024158 |
| 240490_at   | ST3GAL3      | ST3 beta-galactoside alpha-2,3-sialyltransferase 3                       | 0.003586714 | 0.091063148 | 0.380691926 | 1.297575176 | 1.239698815 | 0.955396525 |
| 1555405_at  | UBE3C        | ubiquitin protein ligase E3C                                             | 0.019907964 | 0.069680909 | 0.732049089 | 1.843877256 | 1.92837243  | 1.045824728 |
| 237136_at   | MYO1E        | Myosin IE                                                                | 0.03895426  | 0.041856486 | 0.349780165 | 1.691237941 | 1.891788395 | 1.118582045 |
| 237218_at   | RP11-82K18.3 | Kynurenine aminotransferase III                                          | 0.00952218  | 0.077519217 | 0.972207677 | 2.83172202  | 2.851370611 | 1.006938743 |
| 240977_at   | LRCH1        | Leucine-rich repeats and calponin homology (CH) domain containing 1      | 0.002271396 | 0.029831154 | 0.811296935 | 2.566761819 | 2.636656387 | 1.02723064  |
| 231695_at   | DIP2B        | DIP2 disco-interacting protein 2 homolog B (Drosophila)                  | 0.02621283  | 0.007860661 | 0.227286811 | 1.673320219 | 2.011867613 | 1.202320745 |
| 1561053_at  |              | ---                                                                      | 0.025903067 | 0.034884239 | 0.532049497 | 1.233527858 | 1.206757487 | 0.978297717 |

**Supplemental Table 2. qRT-PCR data of patients with FHL. Validation of microarray data.**

|    | GENE SYMBOL | CONTROL                            | LH1                                | LH1            | LH1      | LH2                                | LH2            | LH2      | LH3                                | LH3            | LH3      |
|----|-------------|------------------------------------|------------------------------------|----------------|----------|------------------------------------|----------------|----------|------------------------------------|----------------|----------|
|    |             | 2 <sup>^-</sup><br>Avg.(Delta(Ct)) | 2 <sup>^-</sup><br>Avg.(Delta(Ct)) | Fold<br>Change | p-value  | 2 <sup>^-</sup><br>Avg.(Delta(Ct)) | Fold<br>Change | p-value  | 2 <sup>^-</sup><br>Avg.(Delta(Ct)) | Fold<br>Change | p-value  |
| 1  | CDKN2C      | 0.001176                           | 0.001807                           | 1.5369         | 0.611834 | 0.000176                           | 0.1497         | 0.08152  | 0.00013                            | 0.1103         | 0.070076 |
| 2  | RNF26       | 0.002618                           | 0.001832                           | 0.6998         | 0.396556 | 0.000325                           | 0.1241         | 0.051762 | 0.000535                           | 0.2045         | 0.078896 |
| 3  | UQCRH       | 0.0965                             | 0.109766                           | 1.1375         | 0.881178 | 0.03224                            | 0.3341         | 0.083083 | 0.03098                            | 0.321          | 0.135701 |
| 4  | LRDD        | 0.000181                           | 0.00036                            | 1.9873         | 0.316969 | 0.000255                           | 1.4077         | 0.180499 | 0.001029                           | 5.6798         | 0.016807 |
| 5  | HLA-DRB4    | 0.003561                           | 0.019438                           | 5.4579         | 0.352544 | 0.024433                           | 6.8606         | 0.146149 | 0.00216                            | 0.6064         | 0.364612 |
| 6  | ADCK2       | 0.000883                           | 0.001425                           | 1.6142         | 0.218242 | 0.000343                           | 0.3885         | 0.083462 | 0.002459                           | 2.7863         | 0.009224 |
| 7  | C18orf8     | 0.003058                           | 0.001645                           | 0.5381         | 0.385879 | 0.00197                            | 0.6443         | 0.136294 | 0.008897                           | 2.9096         | 0.000925 |
| 8  | HIAT1       | 0.008815                           | 0.004953                           | 0.5619         | 0.039725 | 0.007164                           | 0.8127         | 0.885267 | 0.015761                           | 1.788          | 0.03563  |
| 9  | GIMAP1      | 0.001322                           | 0.000071                           | 0.0536         | 0.052552 | 0.002033                           | 1.5378         | 0.46904  | 0.002815                           | 2.13           | 0.120374 |
| 10 | DCAKD       | 0.003283                           | 0.000918                           | 0.2795         | 0.101998 | 0.005563                           | 1.6945         | 0.708894 | 0.005592                           | 1.7033         | 0.738808 |
| 11 | FKBP5       | 0.020428                           | 0.002438                           | 0.1194         | 0.045169 | 0.070073                           | 3.4303         | 0.015042 | 0.092944                           | 4.5499         | 0.009752 |
| 12 | GTPBP2      | 0.00094                            | 0.000384                           | 0.4082         | 0.301524 | 0.000485                           | 0.5158         | 0.272364 | 0.003793                           | 4.0348         | 0.529303 |
| 13 | FLJ20366    | 0.000908                           | 0.000103                           | 0.1134         | 0.050033 | 0.0024                             | 2.6436         | 0.071886 | 0.001336                           | 1.4717         | 0.242712 |
| 14 | ETV3        | 0.010896                           | 0.021456                           | 1.9691         | 0.185999 | 0.001943                           | 0.1783         | 0.063448 | 0.002577                           | 0.2365         | 0.091723 |
| 15 | KIF5C       | 0.000532                           | 0.000607                           | 1.1421         | 0.024687 | 0.000051                           | 0.0963         | 0.000268 | 0.000264                           | 0.4971         | 0.921096 |
| 16 | RPS27       | 2.259233                           | 1.252664                           | 0.5545         | 0.519011 | 0.597703                           | 0.2646         | 0.024225 | 1.276771                           | 0.5651         | 0.31709  |
| 17 | PDE4B       | 0.012076                           | 0.017855                           | 1.4785         | 0.131033 | 0.020761                           | 1.7191         | 0.10653  | 0.004718                           | 0.3907         | 0.087438 |
| 18 | DOCK4       | 0.000208                           | 0.000885                           | 4.2526         | 0.000939 | 0.000079                           | 0.3811         | 0.076677 | 0.000093                           | 0.447          | 0.154362 |
| 19 | RFX7        | 0.006884                           | 0.00123                            | 0.1786         | 0.029482 | 0.006368                           | 0.925          | 0.841571 | 0.002971                           | 0.4315         | 0.161615 |
| 20 | KIAA1128    | 0.02864                            | 0.020797                           | 0.7261         | 0.309644 | 0.048111                           | 1.6799         | 0.256256 | 0.023276                           | 0.8127         | 0.987341 |
| 21 | MTHFD1L     | 0.000439                           | 0.002748                           | 6.255          | 0.00027  | 0.012028                           | 27.379         | 0.000005 | 0.007494                           | 17.0595        | 0.000038 |
| 22 | GAPDH       | 0.264102                           | 1.134849                           | 4.297          | 0.000001 | 0.725728                           | 2.7479         | 0.000482 | 0.594604                           | 2.2514         | 0.012192 |
| 23 | B2M         | 1                                  | 1                                  | 1              | 0        | 1                                  | 1              | 0        | 1                                  | 1              | 0        |
| 24 | HGDC        | 0.000016                           | 0.000004                           | 0.224          | 0.581275 | 0.000014                           | 0.8507         | 0.581928 | 0.000016                           | 0.9604         | 0.582022 |

|    | <b>GENE SYMBOL</b> | <b>CONTROL</b>                              | <b>LH4</b>                                  | <b>LH4</b>             | <b>LH4</b>     | <b>LH6</b>                                  | <b>LH6</b>             | <b>LH6</b>     | <b>LH7</b>                                  | <b>LH7</b>             | <b>LH7</b>     |
|----|--------------------|---------------------------------------------|---------------------------------------------|------------------------|----------------|---------------------------------------------|------------------------|----------------|---------------------------------------------|------------------------|----------------|
|    |                    | <b>2<sup>^(-)</sup><br/>Avg.(Delta(Ct))</b> | <b>2<sup>^(-)</sup><br/>Avg.(Delta(Ct))</b> | <b>Fold<br/>Change</b> | <b>p-value</b> | <b>2<sup>^(-)</sup><br/>Avg.(Delta(Ct))</b> | <b>Fold<br/>Change</b> | <b>p-value</b> | <b>2<sup>^(-)</sup><br/>Avg.(Delta(Ct))</b> | <b>Fold<br/>Change</b> | <b>p-value</b> |
| 1  | CDKN2C             | 0.001176                                    | 0.001909                                    | 1.6236                 | 0.690415       | 0.002413                                    | 2.0527                 | 0.104098       | 0.000718                                    | 0.611                  | 0.364761       |
| 2  | RNF26              | 0.002618                                    | 0.011951                                    | 4.5657                 | 0.000311       | 0.007692                                    | 2.9383                 | 0.027689       | 0.005934                                    | 2.2671                 | 0.073996       |
| 3  | UQCRH              | 0.0965                                      | 0.167241                                    | 1.7331                 | 0.348502       | 0.226487                                    | 2.347                  | 0.071848       | 0.116899                                    | 1.2114                 | 0.934409       |
| 4  | LRDD               | 0.000181                                    | 0.001597                                    | 8.8203                 | 0.000089       | 0.000373                                    | 2.061                  | 0.024194       | 0.000181                                    | 0.9983                 | 0.59518        |
| 5  | HLA-DRB4           | 0.003561                                    | 0.008974                                    | 2.5198                 | 0.927332       | 0.002464                                    | 0.6918                 | 0.691797       | 0.001375                                    | 0.386                  | 0.223171       |
| 6  | ADCK2              | 0.000883                                    | 0.001822                                    | 2.0646                 | 0.049723       | 0.001219                                    | 1.3811                 | 0.160901       | 0.000913                                    | 1.0347                 | 0.80829        |
| 7  | C18orf8            | 0.003058                                    | 0.007669                                    | 2.5082                 | 0.000709       | 0.004172                                    | 1.3645                 | 0.206819       | 0.006494                                    | 2.1238                 | 0.012713       |
| 8  | HIAT1              | 0.008815                                    | 0.013792                                    | 1.5646                 | 0.215177       | 0.010489                                    | 1.1899                 | 0.44013        | 0.017742                                    | 2.0127                 | 0.04047        |
| 9  | GIMAP1             | 0.001322                                    | 0.000357                                    | 0.2698                 | 0.185329       | 0.00004                                     | 0.0303                 | 0.05031        | 0.002113                                    | 1.5984                 | 0.671264       |
| 10 | DCAKD              | 0.003283                                    | 0.006896                                    | 2.1006                 | 0.612573       | 0.001893                                    | 0.5767                 | 0.382355       | 0.004415                                    | 1.3449                 | 0.754051       |
| 11 | FKBP5              | 0.020428                                    | 0.030963                                    | 1.5157                 | 0.164629       | 0.001116                                    | 0.0546                 | 0.036339       | 0.028756                                    | 1.4077                 | 0.276482       |
| 12 | GTPBP2             | 0.00094                                     | 0.002285                                    | 2.4312                 | 0.875454       | 0.001032                                    | 1.0981                 | 0.449169       | 0.001716                                    | 1.8256                 | 0.848074       |
| 13 | FLJ20366           | 0.000908                                    | 0.001818                                    | 2.0023                 | 0.350834       | 0.000076                                    | 0.0838                 | 0.05108        | 0.001631                                    | 1.7963                 | 0.606003       |
| 14 | ETV3               | 0.010896                                    | 0.003166                                    | 0.2905                 | 0.145471       | 0.011801                                    | 1.083                  | 0.844093       | 0.001724                                    | 0.1582                 | 0.091264       |
| 15 | KIF5C              | 0.000532                                    | 0.000035                                    | 0.0665                 | 0.000722       | 0.003813                                    | 7.1685                 | 0.012284       | 0.000047                                    | 0.0886                 | 0.000867       |
| 16 | RPS27              | 2.259233                                    | 0.972655                                    | 0.4305                 | 0.09888        | 7.754319                                    | 3.4323                 | 0.024861       | 0.747425                                    | 0.3308                 | 0.525046       |
| 17 | PDE4B              | 0.012076                                    | 0.052435                                    | 4.3419                 | 0.000009       | 0.030029                                    | 2.4866                 | 0.02509        | 0.002873                                    | 0.2379                 | 0.335415       |
| 18 | DOCK4              | 0.000208                                    | 0.000054                                    | 0.2578                 | 0.067873       | 0.001712                                    | 8.2297                 | 0.031144       | 0.00007                                     | 0.337                  | 0.094557       |
| 19 | RFX7               | 0.006884                                    | 0.002926                                    | 0.4251                 | 0.133539       | 0.005611                                    | 0.8151                 | 0.66295        | 0.000727                                    | 0.1055                 | 0.041081       |
| 20 | KIAA1128           | 0.02864                                     | 0.015697                                    | 0.5481                 | 0.21847        | 0.039146                                    | 1.3668                 | 0.344658       | 0.0066                                      | 0.2304                 | 0.080432       |
| 21 | MTHFD1L            | 0.000439                                    | 0.001594                                    | 3.628                  | 0.002328       | 0.003325                                    | 7.5685                 | 0.007002       | 0.00135                                     | 3.072                  | 0.008397       |
| 22 | GAPDH              | 0.264102                                    | 0.681444                                    | 2.5802                 | 0.02654        | 0.60815                                     | 2.3027                 | 0.008474       | 0.82932                                     | 3.1401                 | 0.005769       |
| 23 | B2M                | 1                                           | 1                                           | 1                      | 0              | 1                                           | 1                      | 0              | 1                                           | 1                      | 0              |
| 24 | HGDC               | 0.000016                                    | 0.000012                                    | 0.7393                 | 0.634977       | 0.00003                                     | 1.8521                 | 0.583087       | 0.000012                                    | 0.7565                 | 0.634985       |

|    | <b>GENE SYMBOL</b> | <b>CONTROL</b>                           | <b>LH8</b>                               | <b>LH8</b>             | <b>LH8</b>     | <b>LH9</b>                               | <b>LH9</b>             | <b>LH9</b>     | <b>LH11</b>                              | <b>LH11</b>            | <b>LH11</b>    |
|----|--------------------|------------------------------------------|------------------------------------------|------------------------|----------------|------------------------------------------|------------------------|----------------|------------------------------------------|------------------------|----------------|
|    |                    | <b>2<sup>-</sup><br/>Avg.(Delta(Ct))</b> | <b>2<sup>-</sup><br/>Avg.(Delta(Ct))</b> | <b>Fold<br/>Change</b> | <b>p-value</b> | <b>2<sup>-</sup><br/>Avg.(Delta(Ct))</b> | <b>Fold<br/>Change</b> | <b>p-value</b> | <b>2<sup>-</sup><br/>Avg.(Delta(Ct))</b> | <b>Fold<br/>Change</b> | <b>p-value</b> |
| 1  | CDKN2C             | 0.001176                                 | 0.001976                                 | 1.6808                 | 0.289357       | 0.001268                                 | 1.0786                 | 0.734114       | 0.003835                                 | 3.2622                 | 0.016189       |
| 2  | RNF26              | 0.002618                                 | 0.00883                                  | 3.3733                 | 0.008206       | 0.007812                                 | 2.9845                 | 0.019153       | 0.003093                                 | 1.1817                 | 0.091146       |
| 3  | UQCRH              | 0.0965                                   | 0.184284                                 | 1.9097                 | 0.099609       | 0.093861                                 | 0.9727                 | 0.573777       | 0.185995                                 | 1.9274                 | 0.112564       |
| 4  | LRDD               | 0.000181                                 | 0.000735                                 | 4.0582                 | 0.018644       | 0.000924                                 | 5.1012                 | 0.002771       | 0.000353                                 | 1.9509                 | 0.01356        |
| 5  | HLA-DRB4           | 0.003561                                 | 0.034674                                 | 9.736                  | 0.040129       | 0.003504                                 | 0.984                  | 0.664312       | 0.049836                                 | 13.9933                | 0.006335       |
| 6  | ADCK2              | 0.000883                                 | 0.000477                                 | 0.5406                 | 0.474088       | 0.001328                                 | 1.5044                 | 0.193842       | 0.000368                                 | 0.4173                 | 0.14142        |
| 7  | C18orf8            | 0.003058                                 | 0.003331                                 | 1.0892                 | 0.553152       | 0.006817                                 | 2.2294                 | 0.003911       | 0.004225                                 | 1.3819                 | 0.040946       |
| 8  | HIAT1              | 0.008815                                 | 0.011125                                 | 1.2621                 | 0.297131       | 0.025737                                 | 2.9197                 | 0.00034        | 0.009269                                 | 1.0515                 | 0.530452       |
| 9  | GIMAP1             | 0.001322                                 | 0.001453                                 | 1.0994                 | 0.817718       | 0.000092                                 | 0.0697                 | 0.099026       | 0.000827                                 | 0.6256                 | 0.391001       |
| 10 | DCAKD              | 0.003283                                 | 0.002995                                 | 0.9122                 | 0.992972       | 0.000683                                 | 0.2079                 | 0.139904       | 0.003393                                 | 1.0335                 | 0.815326       |
| 11 | FKBP5              | 0.020428                                 | 0.037856                                 | 1.8532                 | 0.045033       | 0.002536                                 | 0.1241                 | 0.158783       | 0.089209                                 | 4.3671                 | 0.014127       |
| 12 | GTPBP2             | 0.00094                                  | 0.000551                                 | 0.5857                 | 0.515585       | 0.000219                                 | 0.233                  | 0.243426       | 0.000385                                 | 0.4094                 | 0.31745        |
| 13 | FLJ20366           | 0.000908                                 | 0.000661                                 | 0.7278                 | 0.607764       | 0.000638                                 | 0.703                  | 0.397078       | 0.000499                                 | 0.549                  | 0.542517       |
| 14 | ETV3               | 0.010896                                 | 0.003369                                 | 0.3092                 | 0.138393       | 0.007958                                 | 0.7304                 | 0.380826       | 0.007634                                 | 0.7006                 | 0.77901        |
| 15 | KIF5C              | 0.000532                                 | 0.000077                                 | 0.1443                 | 0.001643       | 0.001764                                 | 3.3173                 | 0.000012       | 0.000162                                 | 0.3043                 | 0.823907       |
| 16 | RPS27              | 2.259233                                 | 1.887749                                 | 0.8356                 | 0.659571       | 1.761332                                 | 0.7796                 | 0.483042       | 0.438303                                 | 0.194                  | 0.046993       |
| 17 | PDE4B              | 0.012076                                 | 0.094732                                 | 7.8444                 | 0.000015       | 0.030963                                 | 2.5639                 | 0.014002       | 0.016785                                 | 1.3899                 | 0.210994       |
| 18 | DOCK4              | 0.000208                                 | 0.000046                                 | 0.2213                 | 0.066731       | 0.000182                                 | 0.8751                 | 0.613285       | 0.000163                                 | 0.7832                 | 0.775207       |
| 19 | RFX7               | 0.006884                                 | 0.001268                                 | 0.1842                 | 0.063657       | 0.000538                                 | 0.0782                 | 0.036772       | 0.00128                                  | 0.1859                 | 0.073891       |
| 20 | KIAA1128           | 0.02864                                  | 0.007958                                 | 0.2779                 | 0.110884       | 0.020146                                 | 0.7034                 | 0.32498        | 0.006992                                 | 0.2441                 | 0.101932       |
| 21 | MTHFD1L            | 0.000439                                 | 0.001343                                 | 3.0578                 | 0.01103        | 0.002079                                 | 4.7322                 | 0.000506       | 0.013508                                 | 30.7497                | 0.000053       |
| 22 | GAPDH              | 0.264102                                 | 0.510506                                 | 1.933                  | 0.02001        | 0.403321                                 | 1.5271                 | 0.199092       | 1.091768                                 | 4.1339                 | 0.000793       |
| 23 | B2M                | 1                                        | 1                                        | 1                      | 0              | 1                                        | 1                      | 0              | 1                                        | 1                      | 0              |
| 24 | HGDC               | 0.000016                                 | 0.000022                                 | 1.3295                 | 0.635376       | 0.000012                                 | 0.7075                 | 0.634974       | 0.000024                                 | 1.4414                 | 0.635518       |



|    | GENE SYMBOL | CONTROL                              | LH12                                 | LH12           | LH12     | LH13                                 | LH13           | LH13     | LH15                                 | LH15           | LH15     |
|----|-------------|--------------------------------------|--------------------------------------|----------------|----------|--------------------------------------|----------------|----------|--------------------------------------|----------------|----------|
|    |             | 2 <sup>^(-)</sup><br>Avg.(Delta(Ct)) | 2 <sup>^(-)</sup><br>Avg.(Delta(Ct)) | Fold<br>Change | p-value  | 2 <sup>^(-)</sup><br>Avg.(Delta(Ct)) | Fold<br>Change | p-value  | 2 <sup>^(-)</sup><br>Avg.(Delta(Ct)) | Fold<br>Change | p-value  |
| 1  | CDKN2C      | 0.001176                             | 0.007289                             | 6.201          | 0.002397 | 0.002954                             | 2.5126         | 0.149588 | 0.003448                             | 2.2618         | 0.106835 |
| 2  | RNF26       | 0.002618                             | 0.026142                             | 9.9866         | 0.001066 | 0.008393                             | 3.2061         | 0.010718 | 0.000111                             | 0.0364         | 0.705512 |
| 3  | UQCRH       | 0.0965                               | 0.416821                             | 4.3194         | 0.00349  | 0.193893                             | 2.0093         | 0.208917 | 0.104145                             | 1.7808         | 0.252153 |
| 4  | LRDD        | 0.000181                             | 0.000473                             | 2.6132         | 0.051337 | 0.000382                             | 2.1104         | 0.012395 | 0.0012                               | 7.0739         | 0.16173  |
| 5  | HLA-DRB4    | 0.003561                             | 0.057016                             | 16.0092        | 0.023853 | 0.001631                             | 0.458          | 0.243113 | 0.005473                             | 0.6541         | 0.218681 |
| 6  | ADCK2       | 0.000883                             | 0.00285                              | 3.2284         | 0.017088 | 0.001052                             | 1.1913         | 0.656896 | 0.003852                             | 5.1159         | 0.001082 |
| 7  | C18orf8     | 0.003058                             | 0.009339                             | 3.0543         | 0.000078 | 0.004876                             | 1.5948         | 0.104858 | 0.002518                             | 0.9091         | 0.687799 |
| 8  | HIAT1       | 0.008815                             | 0.038407                             | 4.357          | 0.000001 | 0.011625                             | 1.3187         | 0.035296 | 0.010097                             | 1.3851         | 0.512229 |
| 9  | GIMAP1      | 0.001322                             | 0.001686                             | 1.2753         | 0.817949 | 0.000546                             | 0.4127         | 0.207384 | 0.000046                             | 0.0272         | 0.061587 |
| 10 | DCAKD       | 0.003283                             | 0.013961                             | 4.2526         | 0.011168 | 0.007239                             | 2.2051         | 0.469433 | 0.000178                             | 0.0363         | 0.068379 |
| 11 | FKBP5       | 0.020428                             | 0.041738                             | 2.0432         | 0.152341 | 0.11162                              | 5.4642         | 0.000027 | 0.001289                             | 0.0557         | 0.040841 |
| 12 | GTPBP2      | 0.00094                              | 0.000101                             | 0.1073         | 0.255229 | 0.000259                             | 0.2752         | 0.315059 | 0.004613                             | 5.1041         | 0.134299 |
| 13 | FLJ20366    | 0.000908                             | 0.000417                             | 0.4593         | 0.159514 | 0.000191                             | 0.2105         | 0.110755 | 0.000114                             | 0.1124         | 0.05593  |
| 14 | ETV3        | 0.010896                             | 0.006524                             | 0.5987         | 0.417609 | 0.004354                             | 0.3996         | 0.272608 | 0.224793                             | 43.2112        | 0.010869 |
| 15 | KIF5C       | 0.000532                             | 0.000149                             | 0.2796         | 0.002036 | 0.000215                             | 0.4043         | 0.019556 | 0.00205                              | 4.5473         | 0.000072 |
| 16 | RPS27       | 2.259233                             | 3.5801                               | 1.5847         | 0.123012 | 1.079228                             | 0.4777         | 0.486465 | 0.716978                             | 0.3675         | 0.09951  |
| 17 | PDE4B       | 0.012076                             | 0.024476                             | 2.0267         | 0.063479 | 0.005563                             | 0.4606         | 0.107699 | 0.153184                             | 21.9199        | 0.000001 |
| 18 | DOCK4       | 0.000208                             | 0.0002                               | 0.9598         | 0.790587 | 0.000117                             | 0.5642         | 0.206352 | 0.000582                             | 3.0543         | 0.000174 |
| 19 | RFX7        | 0.006884                             | 0.007239                             | 1.0515         | 0.879411 | 0.002724                             | 0.3957         | 0.124554 | 0.009981                             | 1.4557         | 0.315659 |
| 20 | KIAA1128    | 0.02864                              | 0.024775                             | 0.865          | 0.900021 | 0.015553                             | 0.5431         | 0.238446 | 0.110849                             | 3.4882         | 0.008097 |
| 21 | MTHFD1L     | 0.000439                             | 0.00349                              | 7.9447         | 0.000039 | 0.00327                              | 7.4427         | 0.000066 | 0.001436                             | 3.1511         | 0.00386  |
| 22 | GAPDH       | 0.264102                             | 1.285652                             | 4.868          | 0.000127 | 0.125                                | 0.4733         | 0.69572  | 0.557354                             | 2.1251         | 0.033944 |
| 23 | B2M         | 1                                    | 1                                    | 1              | 0        | 1                                    | 1              | 0        | 1                                    | 1              | 0        |
| 24 | HGDC        | 0.000016                             | 0.00003                              | 1.8585         | 0.582882 | 0.000035                             | 2.1747         | 0.636127 | 0.000011                             | 0.5406         | 0.634867 |

|    | GENE SYMBOL | CONTROL                              | LH16                                 | LH16           | LH16     | LH17                                 | LH17           | LH17     | LH18                                 | LH18           | LH18     |
|----|-------------|--------------------------------------|--------------------------------------|----------------|----------|--------------------------------------|----------------|----------|--------------------------------------|----------------|----------|
|    |             | 2 <sup>^(-)</sup><br>Avg.(Delta(Ct)) | 2 <sup>^(-)</sup><br>Avg.(Delta(Ct)) | Fold<br>Change | p-value  | 2 <sup>^(-)</sup><br>Avg.(Delta(Ct)) | Fold<br>Change | p-value  | 2 <sup>^(-)</sup><br>Avg.(Delta(Ct)) | Fold<br>Change | p-value  |
| 1  | CDKN2C      | 0.001176                             | 0.018797                             | 12.3306        | 0        | 0.004093                             | 2.6851         | 0.05469  | 0.002563                             | 1.6812         | 0.189476 |
| 2  | RNF26       | 0.002618                             | 0.002031                             | 0.6666         | 0.100743 | 0.01132                              | 3.7149         | 0.01267  | 0.011858                             | 3.8915         | 0.017533 |
| 3  | UQCRH       | 0.0965                               | 0.038651                             | 0.6609         | 0.974952 | 0.202361                             | 3.4601         | 0.094324 | 0.169811                             | 2.9036         | 0.253422 |
| 4  | LRDD        | 0.000181                             | 0.000384                             | 2.2645         | 0.934406 | 0.000706                             | 4.165          | 0.539259 | 0.001128                             | 6.6522         | 0.069289 |
| 5  | HLA-DRB4    | 0.003561                             | 0.00491                              | 0.5868         | 0.199954 | 0.014155                             | 1.6915         | 0.814862 | 0.00736                              | 0.8795         | 0.37011  |
| 6  | ADCK2       | 0.000883                             | 0.005226                             | 6.9403         | 0.000792 | 0.001219                             | 1.6189         | 0.08754  | 0.001532                             | 2.035          | 0.045396 |
| 7  | C18orf8     | 0.003058                             | 0.005934                             | 2.1423         | 0.014317 | 0.002791                             | 1.0075         | 0.23613  | 0.006207                             | 2.2405         | 0.008543 |
| 8  | HIAT1       | 0.008815                             | 0.016289                             | 2.2346         | 0.009858 | 0.022996                             | 3.1547         | 0.003122 | 0.016608                             | 2.2784         | 0.003045 |
| 9  | GIMAP1      | 0.001322                             | 0.002954                             | 1.7281         | 0.641109 | 0.000129                             | 0.0752         | 0.039277 | 0.002766                             | 1.6183         | 0.461843 |
| 10 | DCAKD       | 0.003283                             | 0.007581                             | 1.5431         | 0.735354 | 0.000257                             | 0.0523         | 0.045813 | 0.007578                             | 1.5424         | 0.619768 |
| 11 | FKBP5       | 0.020428                             | 0.179659                             | 7.7633         | 0.014441 | 0.001036                             | 0.0448         | 0.024247 | 0.028008                             | 1.2103         | 0.229021 |
| 12 | GTPBP2      | 0.00094                              | 0.001953                             | 2.161          | 0.875459 | 0.001845                             | 2.0408         | 0.110291 | 0.000435                             | 0.4809         | 0.143959 |
| 13 | FLJ20366    | 0.000908                             | 0.00663                              | 6.5281         | 0.000266 | 0.000066                             | 0.0653         | 0.035069 | 0.000722                             | 0.7107         | 0.210748 |
| 14 | ETV3        | 0.010896                             | 0.000676                             | 0.13           | 0.139306 | 0.047861                             | 9.2002         | 0.082222 | 0.000494                             | 0.095          | 0.49517  |
| 15 | KIF5C       | 0.000532                             | 0.000586                             | 1.2998         | 0.414888 | 0.002915                             | 6.4643         | 0.07329  | 0.00008                              | 0.1774         | 0.033732 |
| 16 | RPS27       | 2.259233                             | 0.907519                             | 0.4652         | 0.13204  | 1.569168                             | 0.8043         | 0.916975 | 0.588046                             | 0.3014         | 0.069019 |
| 17 | PDE4B       | 0.012076                             | 0.00199                              | 0.2847         | 0.160304 | 0.056818                             | 8.1304         | 0.026481 | 0.00272                              | 0.3893         | 0.753993 |
| 18 | DOCK4       | 0.000208                             | 0.000296                             | 1.552          | 0.157884 | 0.002555                             | 13.4078        | 0.000082 | 0.000204                             | 1.0714         | 0.058327 |
| 19 | RFX7        | 0.006884                             | 0.008393                             | 1.2241         | 0.251229 | 0.009958                             | 1.4523         | 0.148093 | 0.007129                             | 1.0398         | 0.449872 |
| 20 | KIAA1128    | 0.02864                              | 0.192109                             | 6.0454         | 0.000174 | 0.188809                             | 5.9415         | 0.036214 | 0.027853                             | 0.8765         | 0.657418 |
| 21 | MTHFD1L     | 0.000439                             | 0.001522                             | 3.3384         | 0.014971 | 0.001169                             | 2.5654         | 0.015258 | 0.001892                             | 4.1502         | 0.004692 |
| 22 | GAPDH       | 0.264102                             | 0.387786                             | 1.4785         | 0.41088  | 0.05366                              | 0.2046         | 0.42273  | 0.666187                             | 2.54           | 0.004332 |
| 23 | B2M         | 1                                    | 1                                    | 1              | 0        | 1                                    | 1              | 0        | 1                                    | 1              | 0        |
| 24 | HGDC        | 0.000016                             | 0.000024                             | 1.156          | 0.635419 | 0.000085                             | 4.0888         | 0.598718 | 0.000042                             | 2.0408         | 0.548783 |

|    | GENE SYMBOL | CONTROL                            | LH19                               | LH19           | LH19     | LH20                               | LH20           | LH20     | LH21                               | LH21           | LH21     |
|----|-------------|------------------------------------|------------------------------------|----------------|----------|------------------------------------|----------------|----------|------------------------------------|----------------|----------|
|    |             | 2 <sup>^-</sup><br>Avg.(Delta(Ct)) | 2 <sup>^-</sup><br>Avg.(Delta(Ct)) | Fold<br>Change | p-value  | 2 <sup>^-</sup><br>Avg.(Delta(Ct)) | Fold<br>Change | p-value  | 2 <sup>^-</sup><br>Avg.(Delta(Ct)) | Fold<br>Change | p-value  |
| 1  | CDKN2C      | 0.001176                           | 0.000686                           | 0.4498         | 0.355987 | 0.002249                           | 1.4751         | 0.613127 | 0.001583                           | 1.0383         | 0.696155 |
| 2  | RNF26       | 0.002618                           | 0.002249                           | 0.738          | 0.650713 | 0.000999                           | 0.328          | 0.123142 | 0.004007                           | 1.3149         | 0.858313 |
| 3  | UQCRH       | 0.0965                             | 0.062789                           | 1.0736         | 0.142667 | 0.088593                           | 1.5148         | 0.258991 | 0.141938                           | 2.427          | 0.752657 |
| 4  | LRDD        | 0.000181                           | 0.00012                            | 0.7051         | 0.606001 | 0.000092                           | 0.5406         | 0.388786 | 0.000323                           | 1.9042         | 0.793416 |
| 5  | HLA-DRB4    | 0.003561                           | 0.043687                           | 5.2204         | 0.026493 | 0.00174                            | 0.2079         | 0.111342 | 0.027268                           | 3.2584         | 0.397108 |
| 6  | ADCK2       | 0.000883                           | 0.000788                           | 1.0461         | 0.868715 | 0.000199                           | 0.2639         | 0.08338  | 0.001101                           | 1.4624         | 0.527495 |
| 7  | C18orf8     | 0.003058                           | 0.008144                           | 2.94           | 0.001769 | 0.00849                            | 3.0649         | 0.0005   | 0.009798                           | 3.5369         | 0.000012 |
| 8  | HIAT1       | 0.008815                           | 0.026892                           | 3.6893         | 0.001366 | 0.027331                           | 3.7494         | 0.000028 | 0.047257                           | 6.483          | 0        |
| 9  | GIMAP1      | 0.001322                           | 0.000764                           | 0.4473         | 0.328358 | 0.001646                           | 0.9632         | 0.472501 | 0.000044                           | 0.0259         | 0.061786 |
| 10 | DCAKD       | 0.003283                           | 0.002712                           | 0.5519         | 0.233974 | 0.004466                           | 0.9091         | 0.439337 | 0.000102                           | 0.0208         | 0.065858 |
| 11 | FKBP5       | 0.020428                           | 0.014714                           | 0.6358         | 0.275902 | 0.125579                           | 5.4264         | 0.000006 | 0.002687                           | 0.1161         | 0.051548 |
| 12 | GTPBP2      | 0.00094                            | 0.000399                           | 0.4419         | 0.233027 | 0.0012                             | 1.3272         | 0.398111 | 0.000892                           | 0.9874         | 0.324726 |
| 13 | FLJ20366    | 0.000908                           | 0.000367                           | 0.3618         | 0.117327 | 0.000326                           | 0.3209         | 0.107521 | 0.000095                           | 0.0932         | 0.053268 |
| 14 | ETV3        | 0.010896                           | 0.004721                           | 0.9075         | 0.635693 | 0.001661                           | 0.3194         | 0.190613 | 0.008315                           | 1.5984         | 0.964702 |
| 15 | KIF5C       | 0.000532                           | 0.000218                           | 0.4835         | 0.052185 | 0.000339                           | 0.7518         | 0.227643 | 0.001387                           | 3.0773         | 0.000401 |
| 16 | RPS27       | 2.259233                           | 1.164734                           | 0.597          | 0.573194 | 0.420448                           | 0.2155         | 0.051673 | 4.40762                            | 2.2592         | 0.039856 |
| 17 | PDE4B       | 0.012076                           | 0.009552                           | 1.3668         | 0.233929 | 0.012633                           | 1.8077         | 0.524372 | 0.032502                           | 4.6509         | 0.00053  |
| 18 | DOCK4       | 0.000208                           | 0.000357                           | 1.8758         | 0.047223 | 0.000068                           | 0.3554         | 0.042151 | 0.00284                            | 14.9027        | 0        |
| 19 | RFX7        | 0.006884                           | 0.002737                           | 0.3991         | 0.057668 | 0.002142                           | 0.3124         | 0.02833  | 0.009037                           | 1.318          | 0.357011 |
| 20 | KIAA1128    | 0.02864                            | 0.024861                           | 0.7823         | 0.458399 | 0.008182                           | 0.2575         | 0.042541 | 0.038562                           | 1.2135         | 0.86516  |
| 21 | MTHFD1L     | 0.000439                           | 0.000638                           | 1.4004         | 0.777727 | 0.00123                            | 2.6991         | 0.021716 | 0.001704                           | 3.7386         | 0.001137 |
| 22 | GAPDH       | 0.264102                           | 0.214641                           | 0.8184         | 0.379996 | 0.590496                           | 2.2514         | 0.020313 | 0.447513                           | 1.7063         | 0.209719 |
| 23 | B2M         | 1                                  | 1                                  | 1              | 0        | 1                                  | 1              | 0        | 1                                  | 1              | 0        |
| 24 | HGDC        | 0.000016                           | 0.000011                           | 0.5443         | 0.6349   | 0.000003                           | 0.16           | 0.634526 | 0.000006                           | 0.2958         | 0.634648 |

|    | <b>GENE SYMBOL</b> | <b>CONTROL</b>                              | <b>LH22</b>                                 | <b>LH22</b>            | <b>LH22</b>    | <b>LH23</b>                                 | <b>LH23</b>            | <b>LH23</b>    | <b>LH26</b>                                 | <b>LH26</b>            | <b>LH26</b>    |
|----|--------------------|---------------------------------------------|---------------------------------------------|------------------------|----------------|---------------------------------------------|------------------------|----------------|---------------------------------------------|------------------------|----------------|
|    |                    | <b>2<sup>^(-)</sup><br/>Avg.(Delta(Ct))</b> | <b>2<sup>^(-)</sup><br/>Avg.(Delta(Ct))</b> | <b>Fold<br/>Change</b> | <b>p-value</b> | <b>2<sup>^(-)</sup><br/>Avg.(Delta(Ct))</b> | <b>Fold<br/>Change</b> | <b>p-value</b> | <b>2<sup>^(-)</sup><br/>Avg.(Delta(Ct))</b> | <b>Fold<br/>Change</b> | <b>p-value</b> |
| 1  | CDKN2C             | 0.001176                                    | 0.01038                                     | 6.8093                 | 0.082539       | 0.00235                                     | 1.5413                 | 0.644927       | 0.001874                                    | 1.229                  | 0.990752       |
| 2  | RNF26              | 0.002618                                    | 0.024947                                    | 8.187                  | 0.082351       | 0.00348                                     | 1.1421                 | 0.852747       | 0.001814                                    | 0.5953                 | 0.3333         |
| 3  | UQCRH              | 0.0965                                      | 0.441351                                    | 7.5466                 | 0.083411       | 0.109071                                    | 1.865                  | 0.396164       | 0.047586                                    | 0.8137                 | 0.073978       |
| 4  | LRDD               | 0.000181                                    | 0.001822                                    | 10.7468                | 0.082811       | 0.000367                                    | 2.1622                 | 0.775131       | 0.000436                                    | 2.5713                 | 0.938559       |
| 5  | HLA-DRB4           | 0.003561                                    | 0.174041                                    | 20.7974                | 0.082191       |                                             | 0.076                  | 0.082852       | 0.00167                                     | 0.199                  | 0.08439        |
| 6  | ADCK2              | 0.000883                                    | 0.006673                                    | 8.8612                 | 0.082364       | 0.000808                                    | 1.073                  | 0.793503       | 0.001109                                    | 1.4726                 | 0.63485        |
| 7  | C18orf8            | 0.003058                                    | 0.065041                                    | 23.4796                | 0.082065       | 0.008051                                    | 2.9063                 | 0.001297       | 0.005226                                    | 1.8867                 | 0.045868       |
| 8  | HIAT1              | 0.008815                                    | 0.195806                                    | 26.8621                | 0.08198        | 0.042101                                    | 5.7757                 | 0.000001       | 0.024349                                    | 3.3404                 | 0.00004        |
| 9  | GIMAP1             | 0.001322                                    | 0.006754                                    | 3.9518                 | 0.082961       | 0.001724                                    | 1.0087                 | 0.638215       | 0.000129                                    | 0.0755                 | 0.071155       |
| 10 | DCAKD              | 0.003283                                    | 0.010934                                    | 2.2256                 | 0.084378       | 0.001935                                    | 0.3939                 | 0.164016       | 0.000279                                    | 0.0568                 | 0.075725       |
| 11 | FKBP5              | 0.020428                                    | 0.044041                                    | 1.9031                 | 0.084273       | 0.00506                                     | 0.2186                 | 0.071898       | 0.002123                                    | 0.0917                 | 0.046188       |
| 12 | GTPBP2             | 0.00094                                     | 0.005689                                    | 6.2948                 | 0.083687       | 0.000543                                    | 0.6008                 | 0.254129       | 0.000799                                    | 0.8837                 | 0.303571       |
| 13 | FLJ20366           | 0.000908                                    | 0.002806                                    | 2.7622                 | 0.083681       | 0.000878                                    | 0.8645                 | 0.414938       | 0.000059                                    | 0.0584                 | 0.047963       |
| 14 | ETV3               | 0.010896                                    | 0.01132                                     | 2.176                  | 0.085987       | 0.020665                                    | 3.9724                 | 0.032217       | 0.009596                                    | 1.8446                 | 0.825596       |
| 15 | KIF5C              | 0.000532                                    | 0.005931                                    | 13.1546                | 0.081945       | 0.001197                                    | 2.6543                 | 0.000082       | 0.008892                                    | 19.7211                | 0.000028       |
| 16 | RPS27              | 2.259233                                    | 10.39271                                    | 5.327                  | 0.08261        | 2.07053                                     | 1.0613                 | 0.997442       | 1.643381                                    | 0.8424                 | 0.730797       |
| 17 | PDE4B              | 0.012076                                    | 0.020689                                    | 2.9605                 | 0.083829       | 0.01577                                     | 2.2566                 | 0.199291       | 0.030678                                    | 4.3898                 | 0.000923       |
| 18 | DOCK4              | 0.000208                                    | 0.000436                                    | 2.2855                 | 0.08356        | 0.000068                                    | 0.3546                 | 0.043167       | 0.001286                                    | 6.7466                 | 0              |
| 19 | RFX7               | 0.006884                                    | 0.01022                                     | 1.4905                 | 0.085064       | 0.002027                                    | 0.2956                 | 0.036372       | 0.003844                                    | 0.5606                 | 0.118669       |
| 20 | KIAA1128           | 0.02864                                     | 0.105477                                    | 3.3192                 | 0.083219       | 0.020054                                    | 0.6311                 | 0.254734       | 0.035077                                    | 1.1038                 | 0.780378       |
| 21 | MTHFD1L            | 0.000439                                    | 0.012174                                    | 26.7074                | 0.082068       | 0.000888                                    | 1.9487                 | 0.211762       | 0.002449                                    | 5.3734                 | 0.000009       |
| 22 | GAPDH              | 0.264102                                    | 0.298851                                    | 1.1394                 | 0.534635       | 0.277392                                    | 1.0576                 | 0.807601       | 0.224793                                    | 0.8571                 | 0.405537       |
| 23 | B2M                | 1                                           | 1                                           | 1                      | 0              | 1                                           | 1                      | 0              | 1                                           | 1                      | 0              |
| 24 | HGDC               | 0.000016                                    | 0.000158                                    | 7.6299                 | 0.093221       | 0.000012                                    | 0.5635                 | 0.63488        | 0.000016                                    | 0.7896                 | 0.635076       |
